# Supplementary material for: Growth, optical and electrical properties of a nonlinear optical crystal NaBa4Al2B8O18Cl3
Source: Royal Society of Chemistry journal article supplement (doi:10.1039/c3ce26938h), 2013-01-01
Supplement: c3ce26938h.pdf [file c3ce26938h.pdf]

## Supporting Information

# Growth, Optical and Electrical Properties of a Nonlinear Optical Crystal $\text{NaBa}_4\text{Al}_2\text{B}_8\text{O}_{18}\text{Cl}_3$

*Jinzhong Fang,<sup>†</sup> Kunpeng Wang,<sup>†</sup> Xuechong Ren,<sup>†</sup> Jianxiu Zhang,<sup>‡,\*</sup> Guochun Zhang,<sup>‡</sup>*

*Jiyang Wang,<sup>§</sup> Yicheng Wu<sup>‡</sup>*

<sup>†</sup> National Center for Materials Service Safety, University of Science and Technology

Beijing, Beijing 100083, P. R. China

<sup>‡</sup> Key Laboratory of Functional Crystal and Laser Technology, Technical Institute of

Physics and Chemistry, Chinese Academy of Sciences, Beijing 100190, P. R. China

<sup>§</sup> State Key Laboratory of Crystal Materials and Institute of Crystal Materials,

Shandong University, Jinan 250100, P. R. China

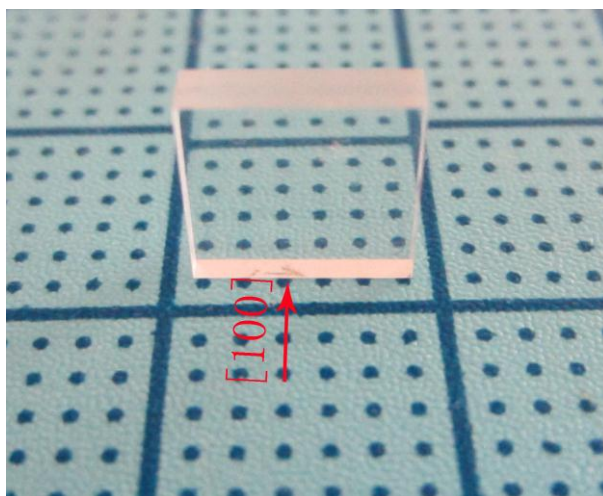

**Figure S1.** (100)-cut NBAC crystal.

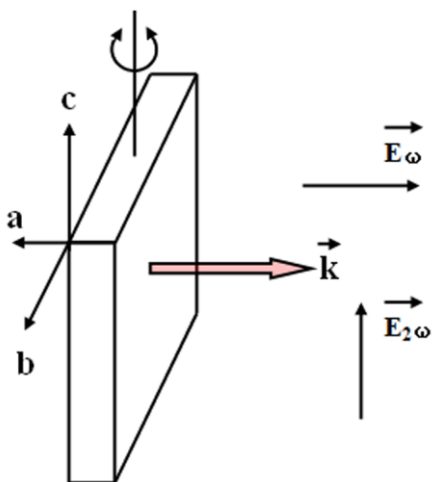

**Figure S2.** Orientation of the (100)-cut NBAC crystal to measure the Maker fringes of  $d_{15}$ ; the  $\vec{E}_\omega$  is the fundamental light; the  $\vec{E}_{2\omega}$  is the second harmonic light.

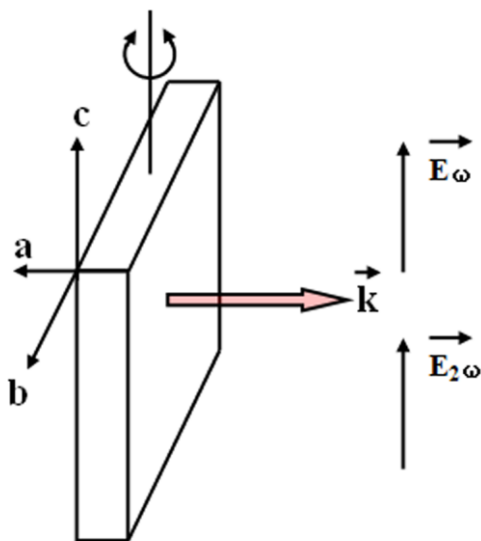

**Figure S3.** Orientation of the (100)-cut NBAC crystal to measure the Maker fringes of  $d_{33}$ ; the  $\vec{E}_\omega$  is the fundamental light; the  $\vec{E}_{2\omega}$  is the second harmonic light.

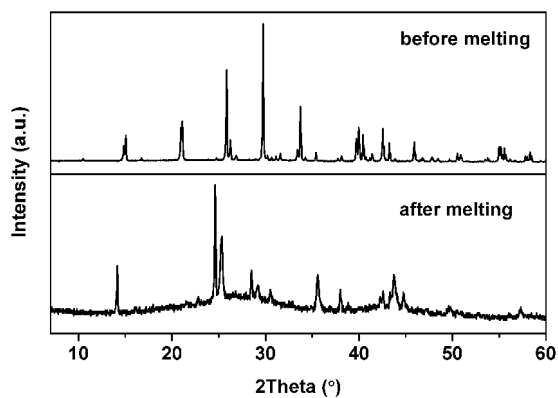

**Figure S4.** The XRD patterns of NBAC before melting and after melting.

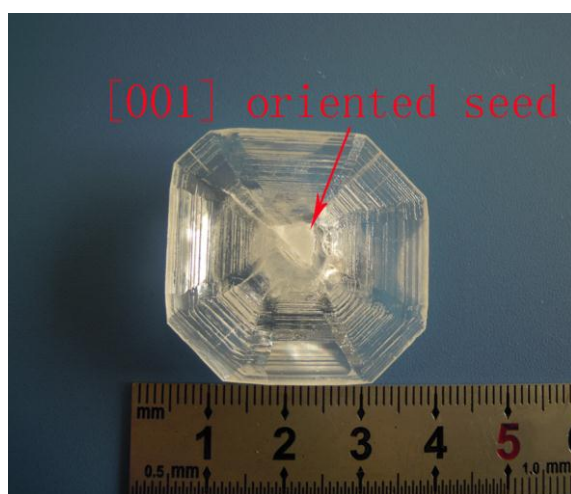

**Figure S5.** The as-grown NBAC crystal with a [001] oriented seed.

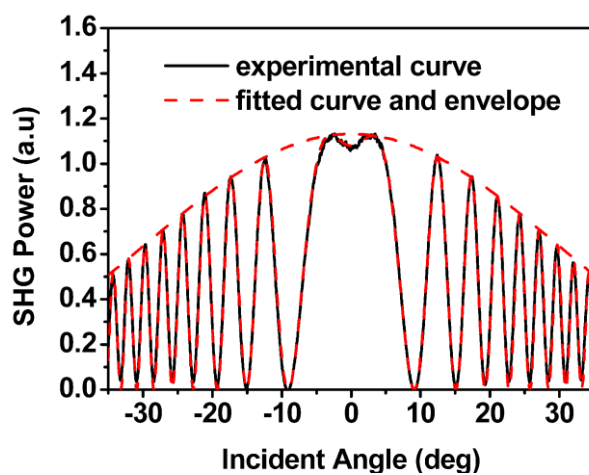

**Figure S6.** The type-I Maker fringes of  $d_{36}$ (KDP).

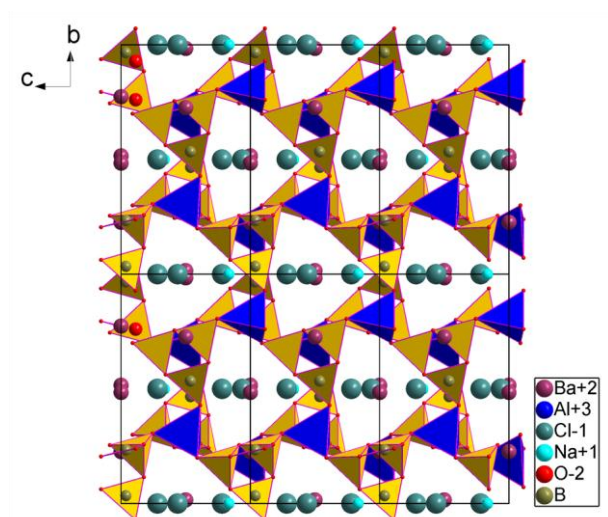

**Figure S7.** View of one-dimensional tunnels along *a* direction.

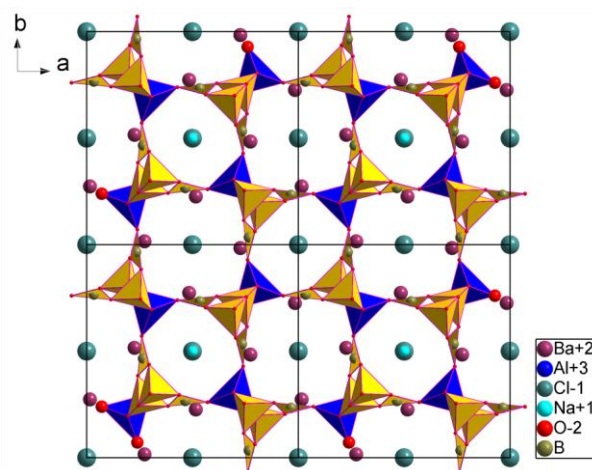

**Figure S8.** View of one-dimensional tunnels along *c* direction.

**Table S1. Indexed XRD peaks for NBAC.**

| No. | 2Theta | d-spacing | Int.        | h | k | l |
|-----|--------|-----------|-------------|---|---|---|
| 1   | 10.375 | 8.5192    | 1102752.59  | 1 | 1 | 0 |
| 2   | 14.693 | 6.024     | 1024199.57  | 0 | 2 | 0 |
| 3   | 14.92  | 5.9328    | 5760333.63  | 0 | 1 | 1 |
| 4   | 16.439 | 5.388     | 60952.34    | 1 | 2 | 0 |
| 5   | 16.643 | 5.3225    | 509385.59   | 1 | 1 | 1 |
| 6   | 20.837 | 4.2596    | 7112130.71  | 2 | 2 | 0 |
| 7   | 21     | 4.227     | 9722727.18  | 1 | 2 | 1 |
| 8   | 23.329 | 3.8099    | 1829.55     | 1 | 3 | 0 |
| 9   | 24.625 | 3.6123    | 336189.49   | 2 | 2 | 1 |
| 10  | 25.726 | 3.4601    | 15230635.49 | 0 | 3 | 1 |
| 11  | 26.125 | 3.4083    | 4791267.34  | 0 | 0 | 2 |
| 12  | 26.656 | 3.3415    | 399301.69   | 2 | 3 | 0 |
| 13  | 26.785 | 3.3257    | 750442.68   | 1 | 3 | 1 |
| 14  | 28.178 | 3.1644    | 94760.5     | 1 | 1 | 2 |
| 15  | 29.635 | 3.012     | 15140164.7  | 0 | 4 | 0 |
| 16  | 29.753 | 3.0004    | 626635.96   | 2 | 3 | 1 |
| 17  | 30.102 | 2.9664    | 947561.49   | 0 | 2 | 2 |
| 18  | 30.569 | 2.9221    | 336902.34   | 1 | 4 | 0 |
| 19  | 31.023 | 2.8804    | 850357.53   | 1 | 2 | 2 |
| 20  | 31.478 | 2.8397    | 2010763.22  | 3 | 3 | 0 |
| 21  | 33.229 | 2.694     | 461466      | 2 | 4 | 0 |
| 22  | 33.335 | 2.6857    | 1346722.64  | 1 | 4 | 1 |
| 23  | 33.65  | 2.6612    | 11616890.06 | 2 | 2 | 2 |
| 24  | 34.178 | 2.6214    | 847343.22   | 3 | 3 | 1 |
| 25  | 35.305 | 2.5402    | 1856589.63  | 1 | 3 | 2 |
| 26  | 35.811 | 2.5054    | 117807.32   | 2 | 4 | 1 |
| 27  | 37.287 | 2.4096    | 833.88      | 3 | 4 | 0 |
| 28  | 37.669 | 2.3861    | 740085.2    | 2 | 3 | 2 |
| 29  | 38.054 | 2.3628    | 753735.17   | 1 | 5 | 0 |
| 30  | 39.64  | 2.2718    | 321822.35   | 0 | 5 | 1 |
| 31  | 39.64  | 2.2718    | 5682027.43  | 3 | 4 | 1 |
| 32  | 39.912 | 2.257     | 5067825.34  | 0 | 4 | 2 |
| 33  | 40.279 | 2.2373    | 28341.24    | 2 | 5 | 0 |
| 34  | 40.363 | 2.2328    | 2263429.84  | 0 | 1 | 3 |
| 35  | 40.369 | 2.2325    | 1751384.97  | 1 | 5 | 1 |
| 36  | 40.637 | 2.2184    | 772785.34   | 1 | 4 | 2 |
| 37  | 41.081 | 2.1954    | 395316.77   | 1 | 1 | 3 |
| 38  | 41.351 | 2.1817    | 2416852.6   | 3 | 3 | 2 |
| 39  | 42.406 | 2.1298    | 2624000.03  | 4 | 4 | 0 |
| 40  | 42.492 | 2.1257    | 7112061.62  | 2 | 5 | 1 |
| 41  | 42.75  | 2.1135    | 597750.35   | 2 | 4 | 2 |

|    |        |        |            |   |   |   |
|----|--------|--------|------------|---|---|---|
| 42 | 43.176 | 2.0936 | 3086892.64 | 1 | 2 | 3 |
| 43 | 43.778 | 2.0662 | 512578.96  | 3 | 5 | 0 |
| 44 | 44.534 | 2.0329 | 86844.21   | 4 | 4 | 1 |
| 45 | 45.116 | 2.008  | 58881.27   | 0 | 6 | 0 |
| 46 | 45.192 | 2.0048 | 108449.1   | 2 | 2 | 3 |
| 47 | 45.773 | 1.9807 | 508567.45  | 1 | 6 | 0 |
| 48 | 45.849 | 1.9776 | 2930065.73 | 0 | 3 | 3 |
| 49 | 45.854 | 1.9774 | 372485.81  | 3 | 5 | 1 |
| 50 | 46.096 | 1.9675 | 310480.06  | 3 | 4 | 2 |
| 51 | 46.498 | 1.9515 | 247324.58  | 1 | 3 | 3 |
| 52 | 46.743 | 1.9418 | 721806.31  | 1 | 5 | 2 |
| 53 | 47.703 | 1.905  | 485527.55  | 2 | 6 | 0 |
| 54 | 47.781 | 1.902  | 493918.87  | 1 | 6 | 1 |
| 55 | 48.333 | 1.8816 | 511341.25  | 4 | 5 | 0 |
| 56 | 48.406 | 1.8789 | 316510.46  | 2 | 3 | 3 |
| 57 | 48.643 | 1.8703 | 11507.36   | 2 | 5 | 2 |
| 58 | 49.651 | 1.8347 | 442967.07  | 2 | 6 | 1 |
| 59 | 50.263 | 1.8138 | 43645.66   | 4 | 5 | 1 |
| 60 | 50.49  | 1.8062 | 2047272.44 | 4 | 4 | 2 |
| 61 | 50.795 | 1.796  | 841556.6   | 3 | 6 | 0 |
| 62 | 50.865 | 1.7937 | 1319501.14 | 1 | 4 | 3 |
| 63 | 51.466 | 1.7742 | 171664.78  | 3 | 3 | 3 |
| 64 | 51.693 | 1.7669 | 84774.21   | 3 | 5 | 2 |
| 65 | 52.654 | 1.7369 | 42317.96   | 2 | 4 | 3 |
| 66 | 52.659 | 1.7367 | 6452.06    | 3 | 6 | 1 |
| 67 | 52.878 | 1.7301 | 144937.66  | 0 | 6 | 2 |
| 68 | 53.463 | 1.7125 | 448631.49  | 1 | 6 | 2 |
| 69 | 53.747 | 1.7041 | 725748.31  | 0 | 0 | 4 |
| 70 | 53.756 | 1.7038 | 162076.6   | 1 | 7 | 0 |
| 71 | 53.756 | 1.7038 | 289316.82  | 5 | 5 | 0 |
| 72 | 54.9   | 1.671  | 249472.17  | 1 | 1 | 4 |
| 73 | 54.91  | 1.6708 | 137130.11  | 4 | 6 | 0 |
| 74 | 54.981 | 1.6688 | 2897997.58 | 0 | 7 | 1 |
| 75 | 55.193 | 1.6628 | 3059296.29 | 2 | 6 | 2 |
| 76 | 55.48  | 1.6549 | 65409.65   | 2 | 7 | 0 |
| 77 | 55.546 | 1.6531 | 29152.52   | 0 | 5 | 3 |
| 78 | 55.546 | 1.6531 | 2229077.77 | 3 | 4 | 3 |
| 80 | 55.551 | 1.653  | 353229.05  | 5 | 5 | 1 |
| 79 | 55.551 | 1.653  | 264562.61  | 1 | 7 | 1 |
| 81 | 55.762 | 1.6472 | 436266.56  | 4 | 5 | 2 |
| 82 | 56.037 | 1.6398 | 28728.58   | 0 | 2 | 4 |
| 83 | 56.112 | 1.6378 | 396866.53  | 1 | 5 | 3 |
| 84 | 56.6   | 1.6248 | 212005.1   | 1 | 2 | 4 |
| 85 | 56.679 | 1.6227 | 84025.39   | 4 | 6 | 1 |

|     |        |        |            |   |   |   |
|-----|--------|--------|------------|---|---|---|
| 86  | 57.238 | 1.6082 | 49837.07   | 2 | 7 | 1 |
| 87  | 57.789 | 1.5942 | 1293702.87 | 2 | 5 | 3 |
| 88  | 57.999 | 1.5889 | 718784.84  | 3 | 6 | 2 |
| 89  | 58.268 | 1.5822 | 1165797.08 | 2 | 2 | 4 |
| 90  | 58.277 | 1.582  | 1259220.82 | 3 | 7 | 0 |
| 91  | 59.363 | 1.5556 | 93470.02   | 1 | 3 | 4 |
| 92  | 59.435 | 1.5539 | 114435.05  | 4 | 4 | 3 |
| 93  | 59.915 | 1.5426 | 687.15     | 5 | 6 | 0 |
| 94  | 59.982 | 1.541  | 252592.74  | 3 | 7 | 1 |
| 95  | 60.517 | 1.5287 | 92298.04   | 3 | 5 | 3 |
| 97  | 60.721 | 1.524  | 403316.87  | 5 | 5 | 2 |
| 96  | 60.721 | 1.524  | 1019895.81 | 1 | 7 | 2 |
| 98  | 60.983 | 1.5181 | 163226.63  | 2 | 3 | 4 |
| 99  | 61.526 | 1.506  | 302934.17  | 0 | 8 | 0 |
| 100 | 61.592 | 1.5045 | 992908.32  | 5 | 6 | 1 |
| 101 | 61.79  | 1.5002 | 49212.94   | 4 | 6 | 2 |
| 103 | 62.057 | 1.4944 | 16300.07   | 4 | 7 | 0 |
| 102 | 62.057 | 1.4944 | 212711.49  | 1 | 8 | 0 |
| 104 | 62.119 | 1.493  | 330511.07  | 1 | 6 | 3 |
| 105 | 62.32  | 1.4887 | 107151.31  | 2 | 7 | 2 |
| 106 | 62.578 | 1.4832 | 1517449.42 | 0 | 4 | 4 |
| 107 | 63.104 | 1.4721 | 20637.93   | 1 | 4 | 4 |
| 108 | 63.628 | 1.4612 | 338285.73  | 3 | 3 | 4 |
| 109 | 63.637 | 1.461  | 49686.58   | 2 | 8 | 0 |
| 110 | 63.697 | 1.4598 | 288344.25  | 2 | 6 | 3 |
| 112 | 63.702 | 1.4597 | 2280141.61 | 4 | 7 | 1 |
| 111 | 63.702 | 1.4597 | 60677.49   | 1 | 8 | 1 |
| 113 | 64.219 | 1.4492 | 15709.47   | 4 | 5 | 3 |
| 114 | 64.669 | 1.4402 | 16621.18   | 2 | 4 | 4 |
| 115 | 64.935 | 1.4349 | 1989326.77 | 3 | 7 | 2 |
| 116 | 65.259 | 1.4286 | 10218.05   | 2 | 8 | 1 |
| 117 | 65.71  | 1.4199 | 340.57     | 6 | 6 | 0 |
| 118 | 66.223 | 1.4101 | 20773.88   | 3 | 8 | 0 |
| 119 | 66.282 | 1.409  | 24423.07   | 3 | 6 | 3 |
| 120 | 66.476 | 1.4053 | 15263.34   | 5 | 6 | 2 |
| 121 | 66.734 | 1.4006 | 23516.23   | 5 | 7 | 0 |
| 122 | 67.234 | 1.3913 | 1051.85    | 3 | 4 | 4 |
| 123 | 67.306 | 1.39   | 464903.89  | 6 | 6 | 1 |
| 124 | 67.741 | 1.3822 | 885959.27  | 1 | 5 | 4 |
| 125 | 67.812 | 1.3809 | 183159.63  | 3 | 8 | 1 |
| 126 | 68     | 1.3775 | 148500.36  | 0 | 8 | 2 |
| 127 | 68.313 | 1.372  | 1167632.25 | 0 | 7 | 3 |
| 128 | 68.317 | 1.3719 | 33897.54   | 5 | 7 | 1 |
| 130 | 68.505 | 1.3686 | 33035.69   | 4 | 7 | 2 |

|     |        |        |           |   |   |   |
|-----|--------|--------|-----------|---|---|---|
| 129 | 68.505 | 1.3686 | 328907.26 | 1 | 8 | 2 |
| 131 | 68.816 | 1.3632 | 285609.21 | 1 | 7 | 3 |
| 132 | 68.816 | 1.3632 | 235053.33 | 5 | 5 | 3 |
| 133 | 69.252 | 1.3556 | 7759.89   | 2 | 5 | 4 |
| 134 | 69.31  | 1.3547 | 174493.07 | 0 | 1 | 5 |
| 135 | 69.76  | 1.347  | 376176.86 | 4 | 8 | 0 |
| 136 | 69.81  | 1.3462 | 22934.82  | 1 | 1 | 5 |
| 137 | 69.818 | 1.346  | 44502.73  | 4 | 6 | 3 |

---
